# Supplementary material for: Cell morphology-based machine learning models for human cell state classification
Source: PubMed Central journal article supplement (PMC8155075; doi:10.1038/s41540-021-00180-y), 2021-05-26
Supplement: 41540_2021_180_MOESM1_ESM.pdf [file 41540_2021_180_MOESM1_ESM.pdf]

## Supplementary Materials

### Supplementary Figure 1

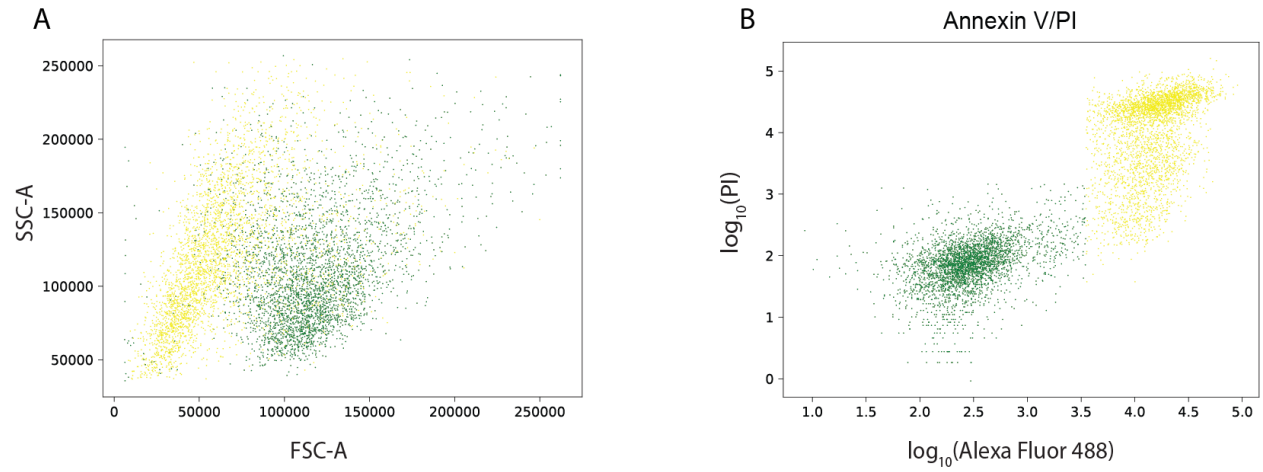

**Supplementary Figure 1. Analysis of the training dataset. (A) SSC-A vs. FSC-A plot, (B) Labeling of live and apoptotic cell subpopulations using the Annexin V/PI apoptosis assay (green: live cells, yellow: apoptotic cells).**

## Supplementary Figure 2

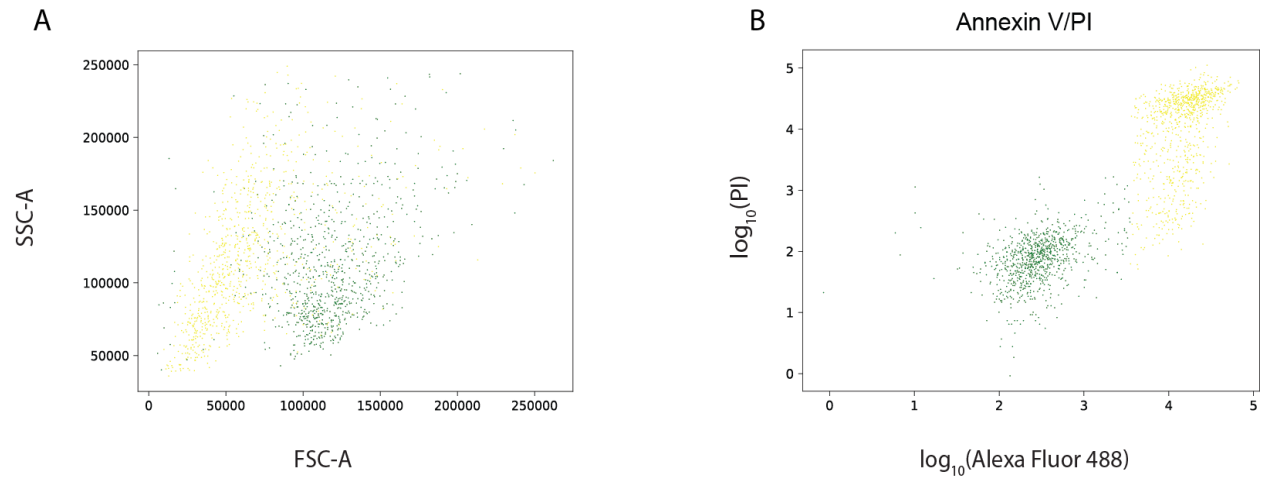

**Supplementary Figure 2. Analysis of the testing dataset. (A) SSC-A vs. FSC-A plot, (B) Labeling of live and apoptotic cell subpopulations using the Annexin V/PI apoptosis assay (green: live cells, yellow: apoptotic cells).**

Supplementary Figure 3

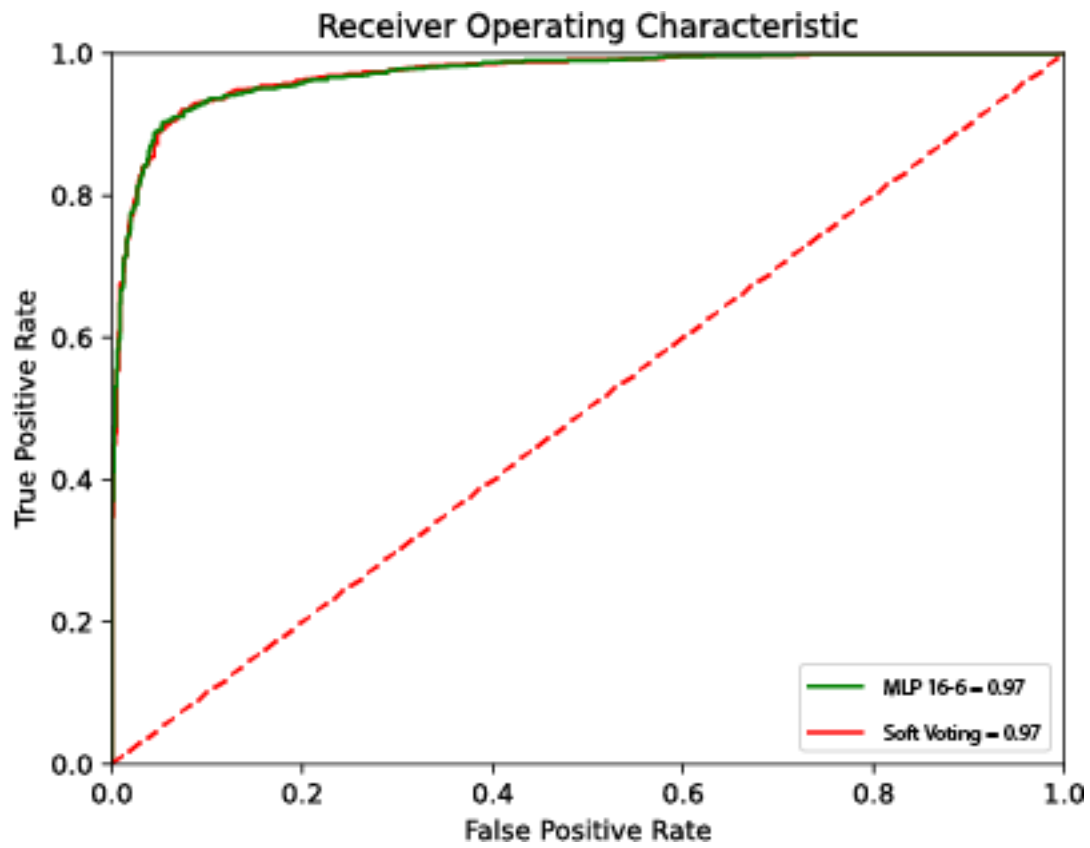

**Supplementary Figure 3. Predictive performances of the ensemble models.** The ensemble models based on the 3 individual candidate models using hard voting or soft voting did not significantly improve the predictive performance compared to the MLP 16-6 model.

Supplementary Figure 4

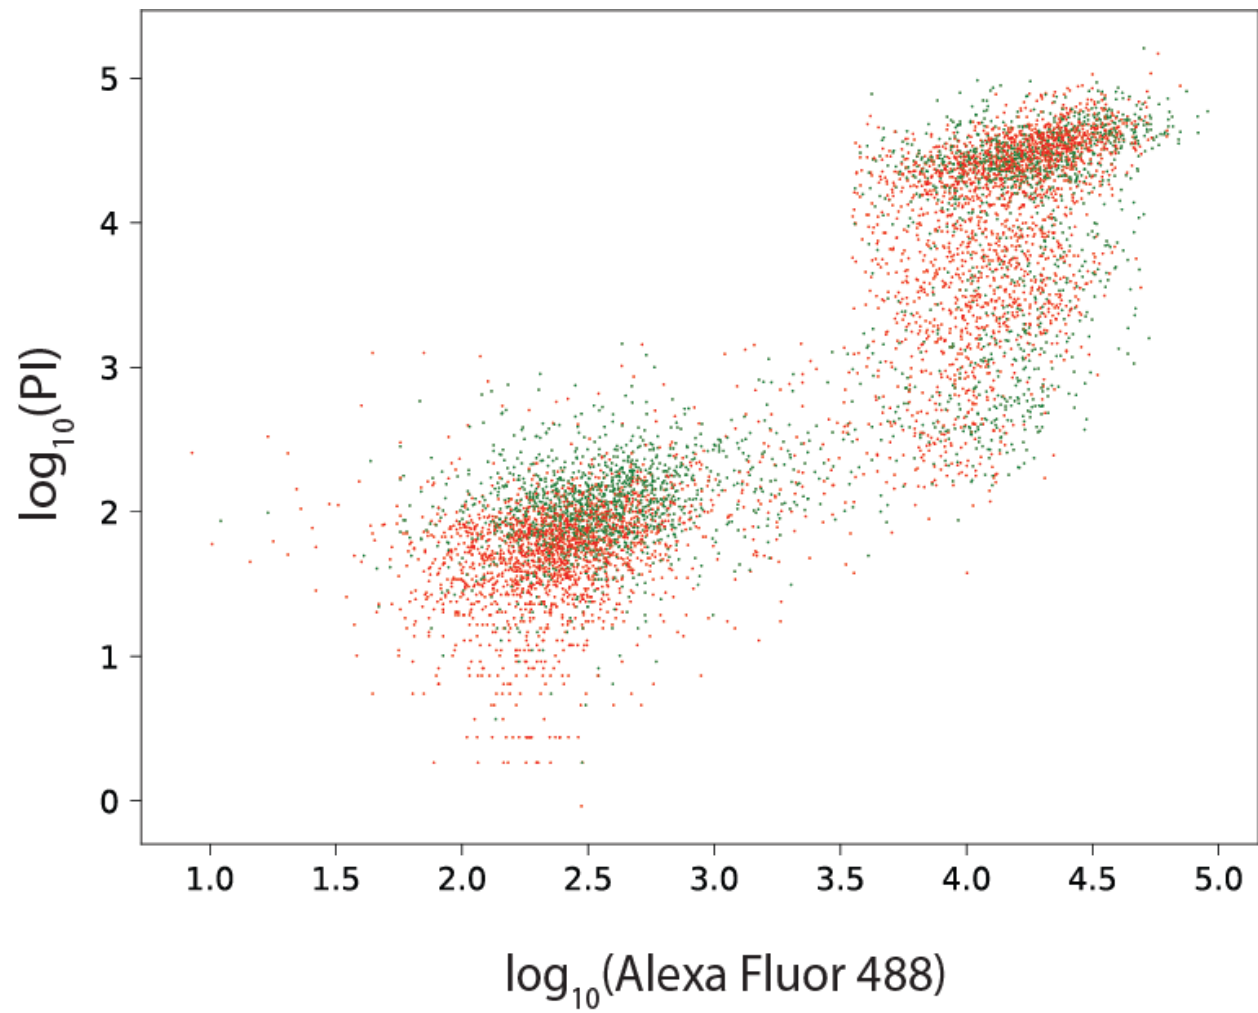

Supplementary Figure 4. Clustering using k-means algorithm on non-standardized training dataset.

Supplementary Figure 5

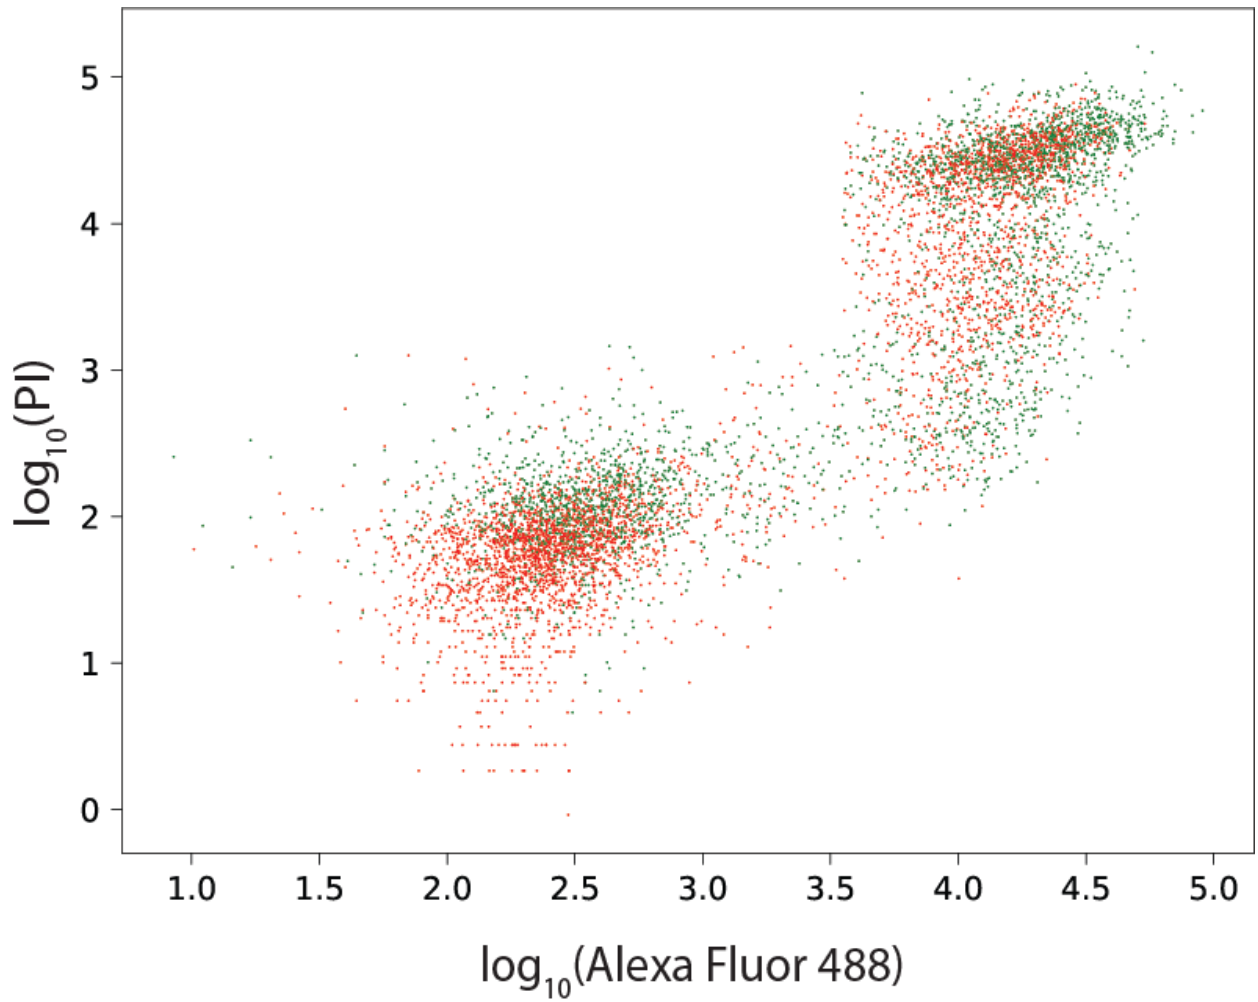

Supplementary Figure 5. Clustering using Gaussian mixture algorithm on non-standardized training dataset.

Supplementary Figure 6

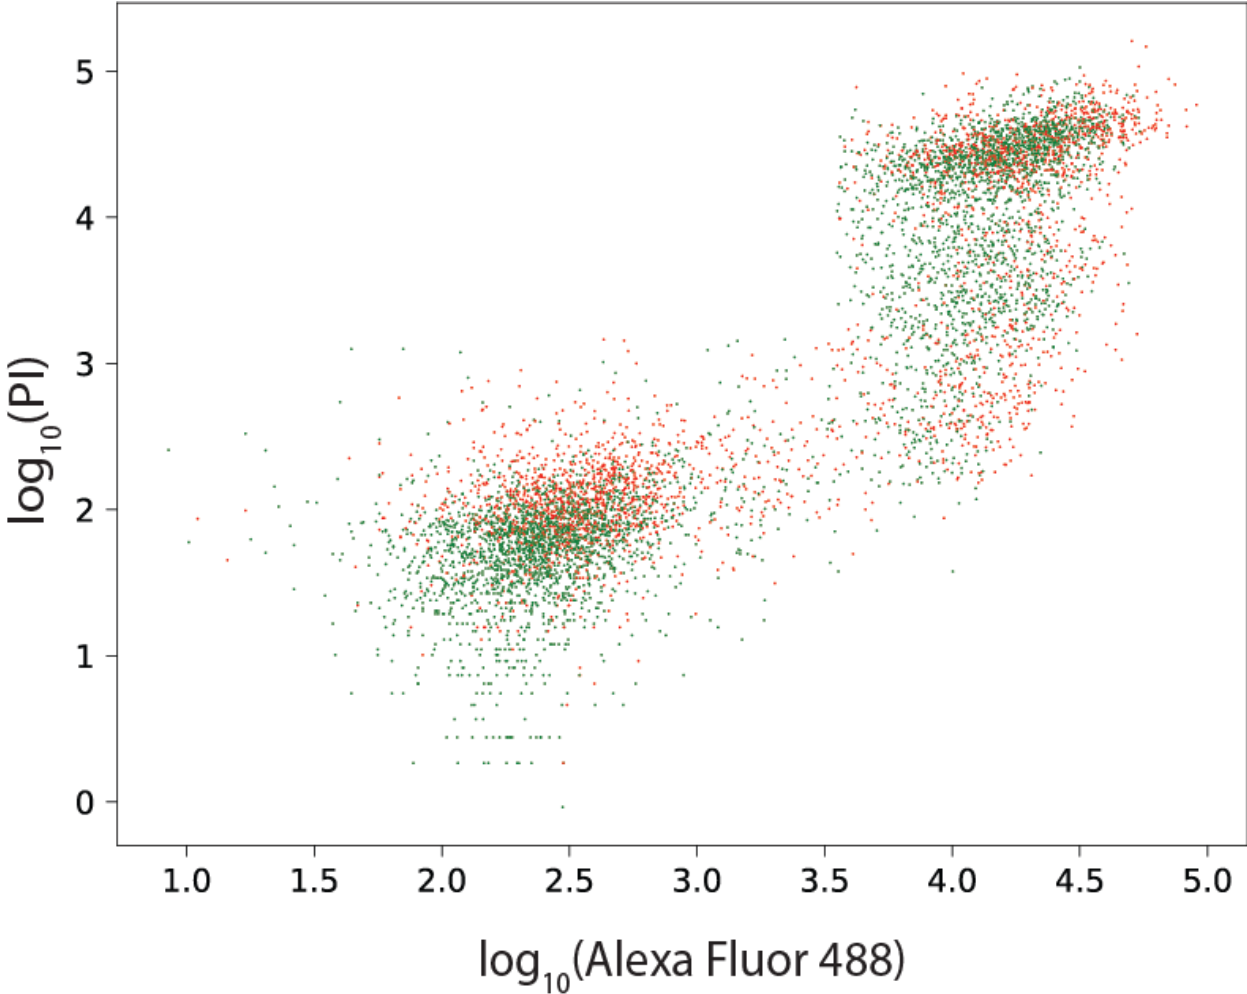

Supplementary Figure 6. Clustering using k-means algorithm on standardized training dataset.

Supplementary Figure 7

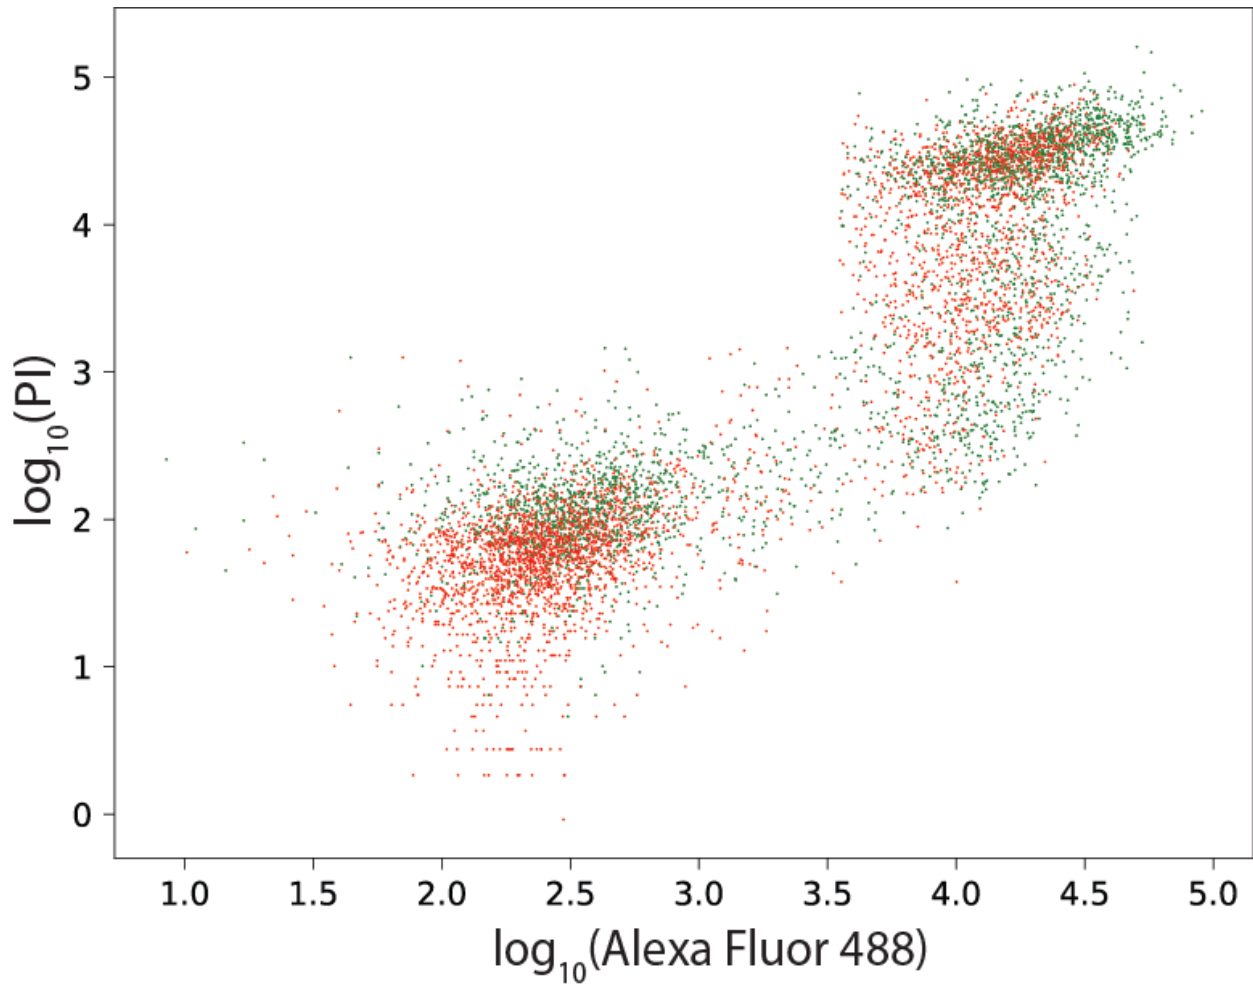

Supplementary Figure 7. Clustering using Gaussian mixture algorithm on standardized training dataset.

Supplementary Figure 8

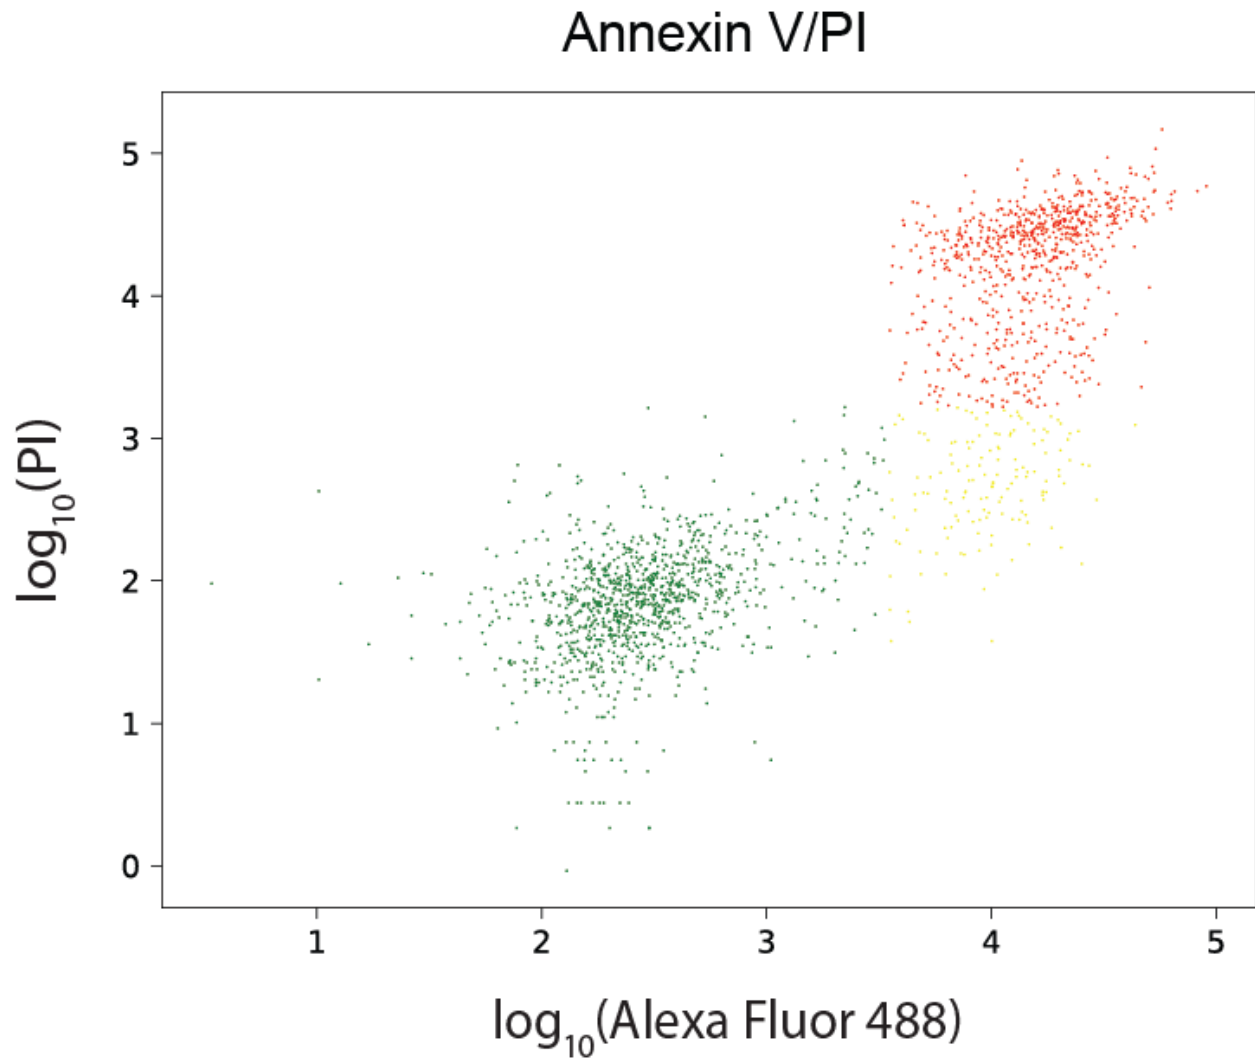

Supplementary Figure 8. Labeling of live, early-apoptotic and late-apoptotic cell subpopulations using the Annexin V/PI apoptosis assay (green: live cells, yellow: early-apoptotic cells, red: late-apoptotic cells).



Supplementary Figure 9

## MLP 7-2

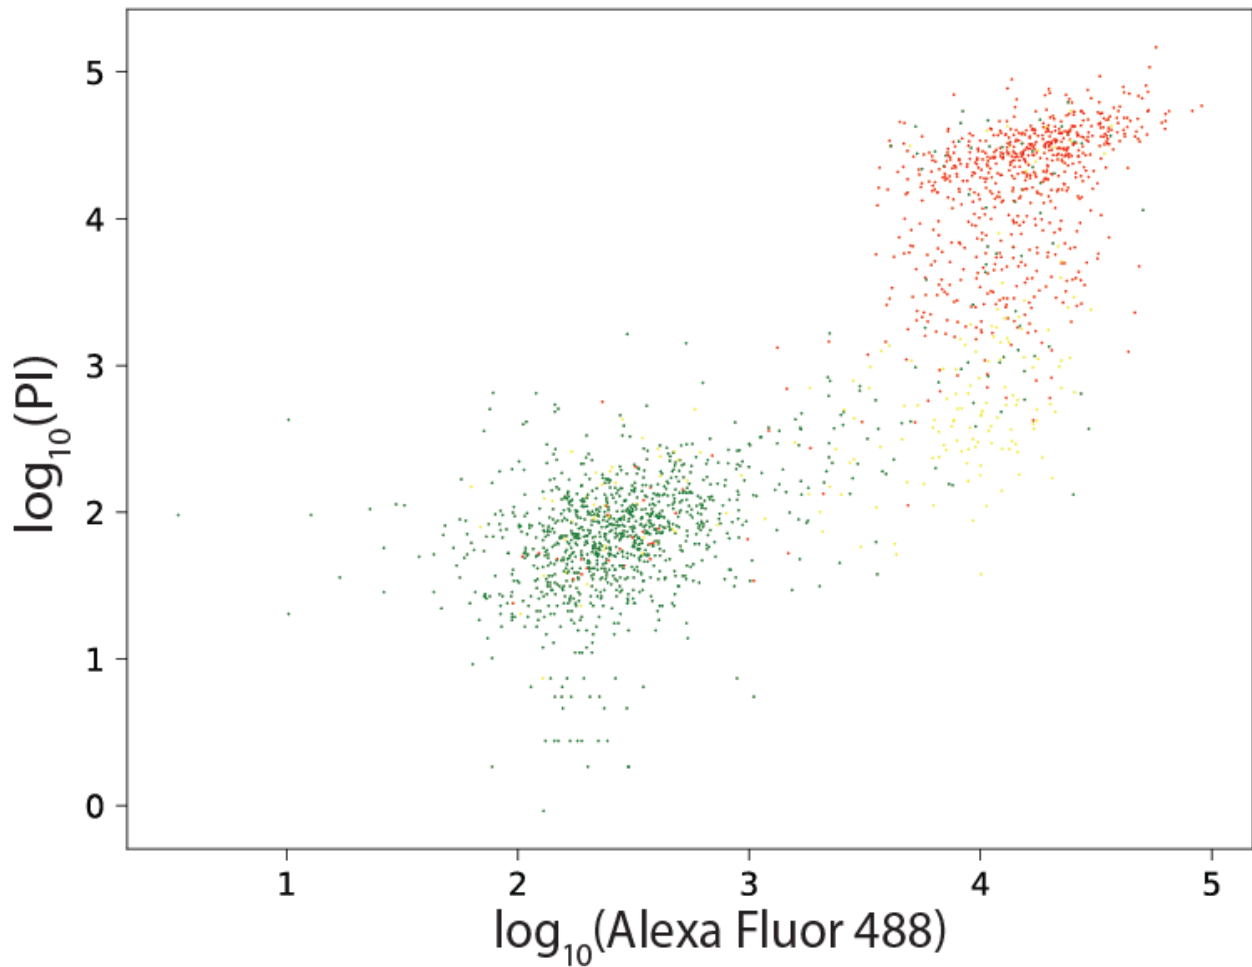

Supplementary Figure 9. Prediction of live, early-apoptotic and late-apoptotic cell subpopulations using a MLP-based learning model (MLP 7-2, number of nodes in the 1<sup>st</sup> layer = 7, number of nodes in the 2<sup>nd</sup> layer = 2, green: live cells, yellow: early-apoptotic cells, red: late-apoptotic cells).

Supplementary Figure 10

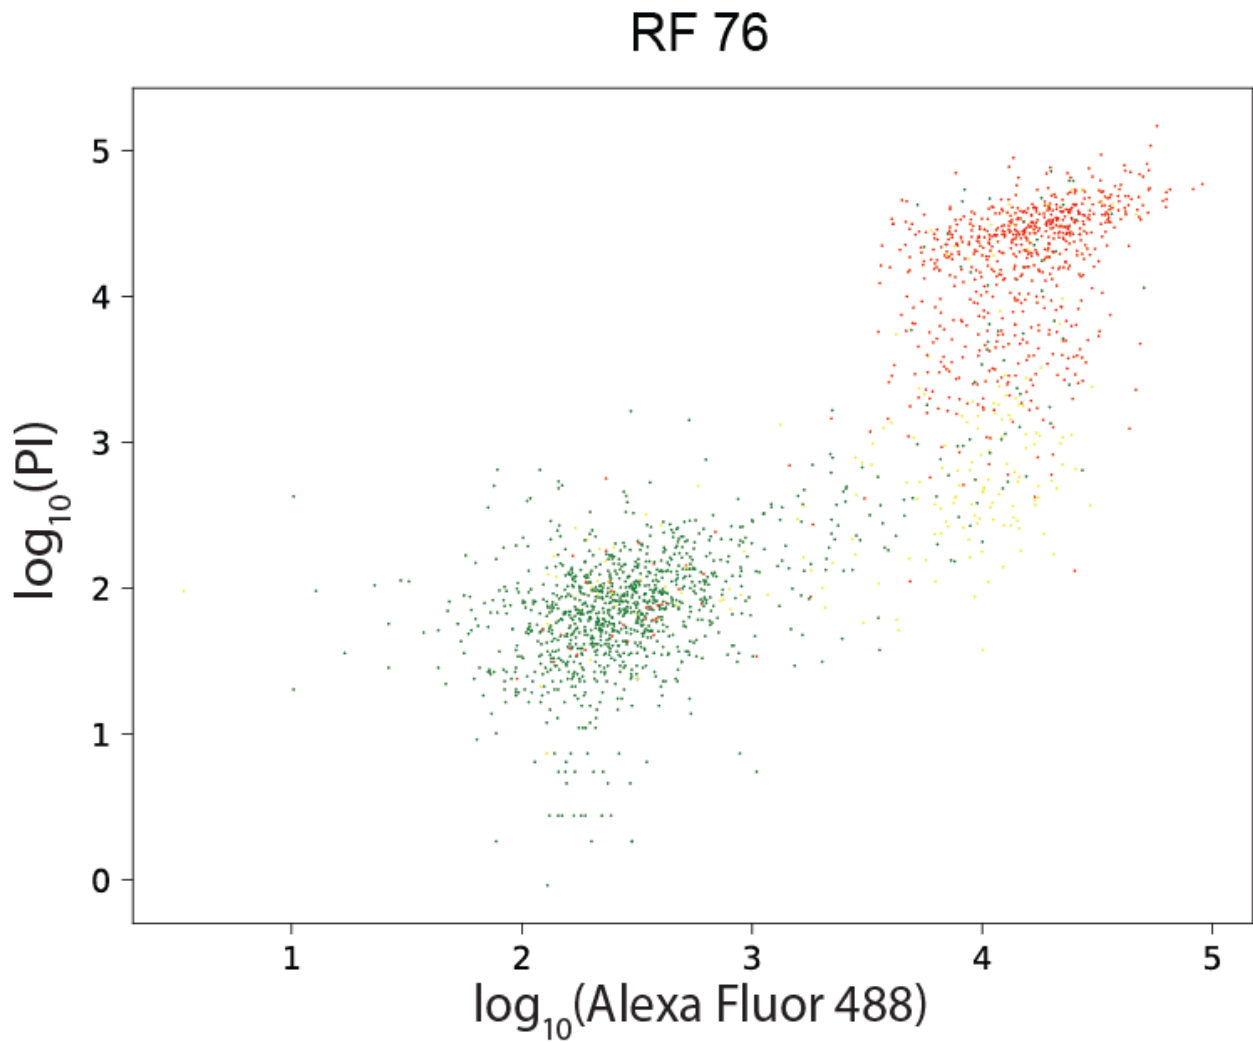

Supplementary Figure 10. Prediction of live, early-apoptotic and late-apoptotic cell subpopulations using a random forest-based learning model (RF 76, number of trees = 76, green: live cells, yellow: early-apoptotic cells, red: late-apoptotic cells).

**Supplementary Scripts. The MLP 16-6 model and other main python scripts used in building and evaluating the predictive models in this study.**

[https://github.com/yilitexas/MachineLearning/tree/main/Supplementary\\_Scripts](https://github.com/yilitexas/MachineLearning/tree/main/Supplementary_Scripts)

**Supplementary Table 1. The training dataset.** The training dataset contained 6,828 cells, of which 3,411 were live and 3,417 were apoptotic.

[https://github.com/yilitexas/MachineLearning/blob/main/supplementary\\_table1.xls](https://github.com/yilitexas/MachineLearning/blob/main/supplementary_table1.xls)

**Supplementary Table 2. The testing dataset.** The testing dataset contained 1,708 cells, of which 857 were live and 857 were apoptotic. [https://github.com/yilitexas/MachineLearning/blob/main/supplementary\\_table2.xls](https://github.com/yilitexas/MachineLearning/blob/main/supplementary_table2.xls)

| feature            | FSC-A       | FSC-H       | FSC-W       | SSC-A       | SSC-H       | SSC-W       |
|--------------------|-------------|-------------|-------------|-------------|-------------|-------------|
| mean               | 91461.29759 | 64077.81678 | 92856.09651 | 116136.1841 | 89860.60984 | 83829.85344 |
| standard deviation | 42073.01065 | 27018.88786 | 9980.780925 | 42723.22343 | 29737.5374  | 6146.286279 |

**Supplementary Table 3. The mean and standard deviation values of the 6 features in the training dataset.**

**Supplementary Table 4. The mean and standard deviation values of 10-fold cross validation accuracy using the random forest algorithm.**

[https://github.com/yilitexas/MachineLearning/blob/main/supplementary\\_table4.xls](https://github.com/yilitexas/MachineLearning/blob/main/supplementary_table4.xls)

**Supplementary Table 5. The mean and standard deviation values of 10-fold cross validation accuracy using the k-NN algorithm.**

[https://github.com/yilitexas/MachineLearning/blob/main/supplementary\\_table5.xls](https://github.com/yilitexas/MachineLearning/blob/main/supplementary_table5.xls)



**Supplementary Table 6. The mean and standard deviation values of 10-fold cross validation accuracy using the MLP algorithm.**

[https://github.com/yilitexas/MachineLearning/blob/main/supplementary\\_table6.xls](https://github.com/yilitexas/MachineLearning/blob/main/supplementary_table6.xls)

**Supplementary Table 7. The mean and standard deviation values of 10-fold cross validation accuracy using the SVM algorithm.**

[https://github.com/yilitexas/MachineLearning/blob/main/supplementary\\_table7.xls](https://github.com/yilitexas/MachineLearning/blob/main/supplementary_table7.xls)

**Supplementary Table 8. The predictive performances of the 96 candidate models which passed both filtering conditions.** [https://github.com/yilitexas/MachineLearning/blob/main/supplementary\\_table8.xls](https://github.com/yilitexas/MachineLearning/blob/main/supplementary_table8.xls)

**Supplementary Table 9. The training dataset with 3 labels.** The training dataset contained 7,992 cells, of which 4,607 were live, 552 were early-apoptotic, and 2,833 were late-apoptotic.  
[https://github.com/yilitexas/MachineLearning/blob/main/supplementary\\_table9.xls](https://github.com/yilitexas/MachineLearning/blob/main/supplementary_table9.xls)

**Supplementary Table 10. The testing dataset with 3 labels.** The testing dataset contained 1,998 cells, of which 1,115 were live, 147 were early-apoptotic, and 736 were late-apoptotic.  
[https://github.com/yilitexas/MachineLearning/blob/main/supplementary\\_table10.xls](https://github.com/yilitexas/MachineLearning/blob/main/supplementary_table10.xls)

**Supplementary Table 11. The training dataset containing synthetic samples for early- and late-apoptotic cells.** The synthetic samples for minority classes (early- and late-apoptotic cells) were generated using the SMOTE algorithm. The training dataset contained 13,821 cells, of which 4,607 were live, 4,607 were early-apoptotic, and 4,607 were late-apoptotic.

[https://github.com/yilitexas/MachineLearning/blob/main/supplementary\\_table11.xls](https://github.com/yilitexas/MachineLearning/blob/main/supplementary_table11.xls)

**Supplementary Table 12. The predictive performances of the 5 candidate MLP models which passed the filtering condition.** [https://github.com/yilitexas/MachineLearning/blob/main/supplementary\\_table12.xls](https://github.com/yilitexas/MachineLearning/blob/main/supplementary_table12.xls)

**Supplementary Table 13. The predictive performances of the 49 candidate random forest models which passed the filtering condition.**

[https://github.com/yilitexas/MachineLearning/blob/main/supplementary\\_table13.xls](https://github.com/yilitexas/MachineLearning/blob/main/supplementary_table13.xls)



**Supplementary Table 14. Comparison of our study and other protocols predicting cell types and states.**

[https://github.com/yilitexas/MachineLearning/blob/main/supplementary\\_table14.xls](https://github.com/yilitexas/MachineLearning/blob/main/supplementary_table14.xls)
